# Supplementary material for: High Oxytocin Receptor Expression Linked to Increased Cell Migration and Reduced Survival in Patients with Triple-Negative Breast Cancer
Source: MDPI journal article supplement (doi:10.3390/biomedicines10071595), 2022-07-05
Supplement: s1 [file s1]

## Supplementary Figures

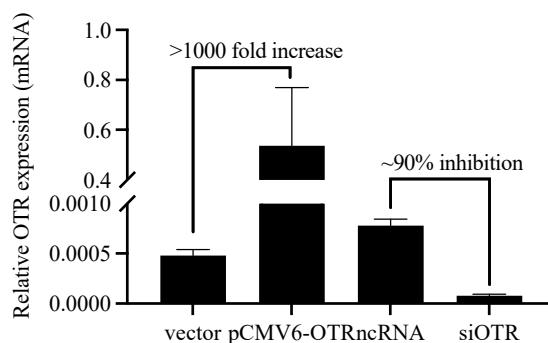

**Figure S1.** Efficiency of plasmid transfection for OTR overexpression and siRNA transfection for OTR knockdown. Data are means  $\pm$  SD of one experiment performed in triplicate.

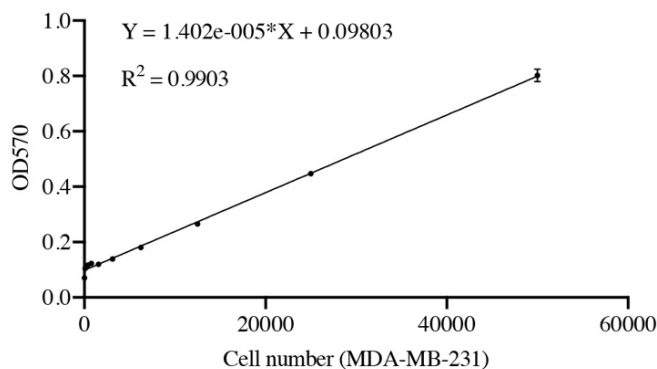

**Figure S2 Standard curve of MDA-MB-231 cell number versus absorbance at 570 nm (OD570).** The cells were diluted with culture medium to a series of cell densities (1:1 serial dilution from 50,000 cells/well to 97 cells/well) and seeded into a 96-well plate, medium without cells was used as negative control (no cells/well). The  $R^2$  value of the curve was  $>0.99$ , indicating that this assay is a practical and effective approach for cell migration quantification. Data are means  $\pm$  SD of one experiment performed in triplicate.

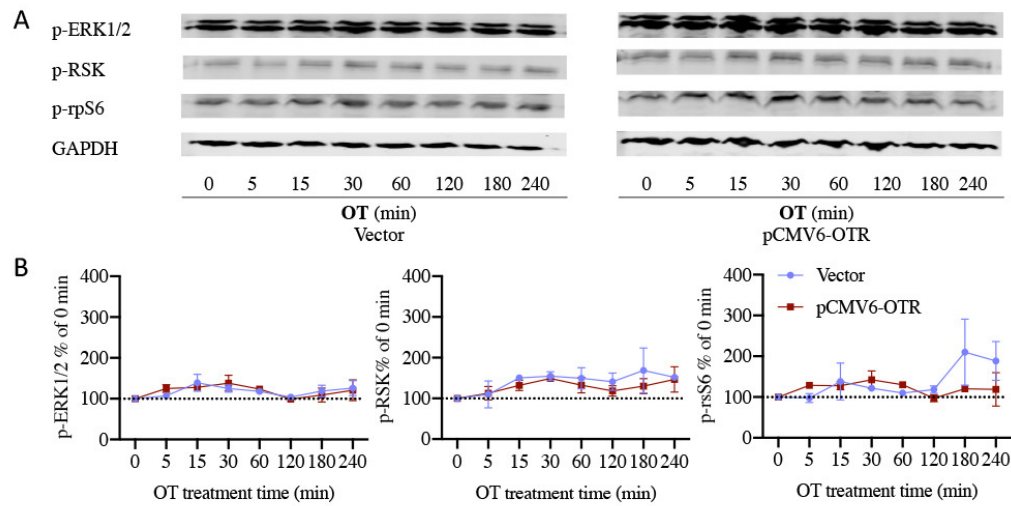

**Figure S3. Representative Western blot images and quantification of phosphorylated ERK1/2, RSK and rpS6 in OT (1  $\mu$ M) treated cells with or without OTR overexpression.** The quantitation of ERK1/2, RSK and rpS6 phosphorylation were relative to the level of GAPDH. Vector group, MDA-MB-231 cells transfected with the vector plasmid, which were used as control cells without OTR overexpression; pCMV6-OTR, MDA-MB-231 cells transfected with the pCMV6-OTR plasmid for OTR overexpression. Data are means  $\pm$  SEM of at least three independent assays. The data were analysed by two-way ANOVA followed by Tukey's multiple comparisons test.
